# Supplementary material for: Antisera-Neutralizing Capacity of a Highly Evolved Type 2 Vaccine-Derived Poliovirus from an Immunodeficient Patient
Source: MDPI journal article supplement (doi:10.3390/v16111761), 2024-11-12
Supplement: s1 [file viruses-3245760-supplementary.pdf › viruses-3245760-supplementary.pdf]

Table S1. The accession numbers for PV

| Accession numbers | Country  | Type           |
|-------------------|----------|----------------|
| AY238473          | USA      | PV2(MEF-1)     |
| X00595            | USA      | PV2(p712)      |
| GU390707          | USA      | iVDPV2         |
| DQ890387          | Nigerian | iVDPV2         |
| FJ517648          | Belarus  | iVDPV2         |
| AJ544513          | UK       | iVDPV2         |
| AY177685          | Italy    | iVDPV2         |
| KR817050          | UK       | iVDPV2         |
| KR817051          | UK       | iVDPV2         |
| KR817052          | UK       | iVDPV2         |
| KR817053          | UK       | iVDPV2         |
| KR817054          | UK       | iVDPV2         |
| KR817055          | UK       | iVDPV2         |
| KR817056          | UK       | iVDPV2         |
| KR817057          | UK       | iVDPV2         |
| KR817058          | UK       | iVDPV2         |
| KR817059          | UK       | iVDPV2         |
| KR817060          | UK       | iVDPV2         |
| GU390704          | USA      | iVDPV2         |
| GU390705          | USA      | iVDPV2         |
| GU390706          | USA      | iVDPV2         |
| MG212487          | Russia   | cVDPV2         |
| KJ170558          | Nigerian | cVDPV2         |
| JX275352          | Nigerian | cVDPV2         |
| KJ170561          | Nigerian | cVDPV2         |
| DQ890385          | Nigerian | cVDPV2         |
| KJ170563          | Nigerian | cVDPV2         |
| KU598886          | Russia   | cVDPV2         |
| HM107835          | China    | cVDPV2         |
| KR817062          | Egypt    | PV2(EGY42)     |
| V01149            | USA      | PV1 ( Mahoney) |
